# Supplementary material for: Synthesis and photophysical properties of fullerene derivatives containing a C60-fluorene core
Source: Royal Society of Chemistry journal article supplement (doi:10.1039/c8nj05944f), 2019-01-01
Supplement: c8nj05944f1.pdf [file c8nj05944f1.pdf]

**Electronic Supplementary Material (ESI) for New Journal of Chemistry.**

---

**Supporting Information**

**Synthesis and photophysical properties of fullerene derivatives  
containing C<sub>60</sub>-fluorene core**

**Tianzhi Yu<sup>1,\*</sup>, Tong Zhang<sup>1</sup>, Xin Wang<sup>1</sup>, Yuling Zhao<sup>2</sup>, Chengjin Wei<sup>1</sup>, Yanmei Li<sup>1</sup>, Hui  
Zhang<sup>1</sup>**

<sup>1</sup>Key Laboratory of Opto-Electronic Technology and Intelligent Control (Ministry of Education), Lanzhou Jiaotong University, Lanzhou 730070, China

<sup>2</sup>School of Chemical and Biological Engineering, Lanzhou Jiaotong University, Lanzhou 730070, China

E-mail: yutzh@mail.lzjtu.cn

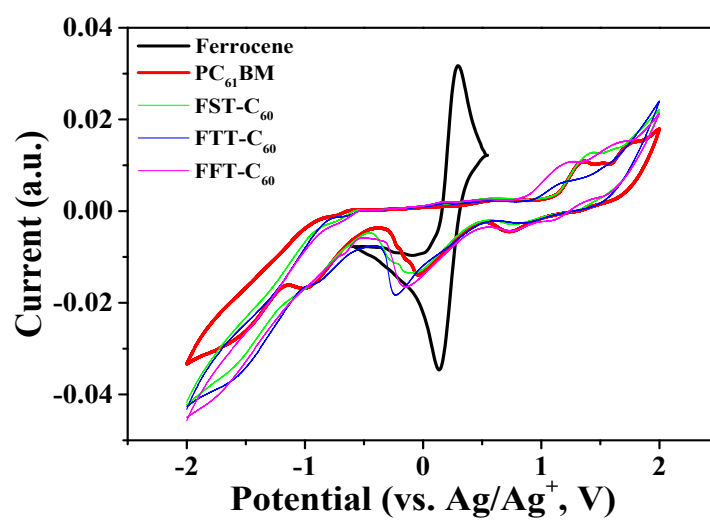

Fig. S1. Cyclic voltammograms of ferrocene, FST-C<sub>60</sub>, FTT-C<sub>60</sub>, FFT-C<sub>60</sub> and PC<sub>61</sub>BM in toluene solutions with 0.1 mol/L Bu<sub>4</sub>NPF<sub>6</sub> at a scan rate of 100 mV/s.
